# Supplementary material for: The use of technology in the treatment of youth with eating disorders: A scoping review
Source: PubMed Central journal article supplement (PMC9700893; doi:10.1186/s40337-022-00697-5), 2022-11-24
Supplement: 40337_2022_697_MOESM1_ESM.pdf [file 40337_2022_697_MOESM1_ESM.pdf]

Supplementary figure 1: Quality assessment of quantitative studies

|                                                                                                                                           | Aardoom et al. 2017 | Anastasiadou et al. 2019 | Anderson et al. 2017 | Carrard et al. 2011 | Fichter et al. 2012 | Giel et al. 2015 | Kim et al., 2019 | Marco et al. 2013 | Neumayr et al., 2019 | Sanchez-Ortiz et al., 2011 | Shingleton et al., 2016 | Tregarthen et al., 2015 | Wagner et al. 2013 | Wagner et al., 2013 (2) | Wagner et al., 2014 | Wilksch et al., 2017 | Lock et al., 2021 | Fichter et al., 2013 |        |
|-------------------------------------------------------------------------------------------------------------------------------------------|---------------------|--------------------------|----------------------|---------------------|---------------------|------------------|------------------|-------------------|----------------------|----------------------------|-------------------------|-------------------------|--------------------|-------------------------|---------------------|----------------------|-------------------|----------------------|--------|
| 1. Were eligibility criteria for study entry prespecified and clearly described?                                                          | Green               | Green                    | Green                | Green               | Green               | Green            | Green            | Green             | Green                | Green                      | Green                   | Red                     | Green              | Green                   | Green               | Green                | Green             | Green                | Green  |
| 2. Was there absence of co-intervention that may influence outcome?                                                                       | Green               | Green                    | Red                  | Green               | Red                 | Red              | Red              | Green             | Red                  | Green                      | Red                     | Red                     | Red                | Red                     | Red                 | Red                  | Green             | Red                  | Red    |
| 3. Were all eligible participants that met the prespecified entry criteria enrolled?                                                      | Red                 | Red                      | Red                  | Green               | Green               | Red              | Red              | Green             | Red                  | Red                        | Red                     | Red                     | Green              | Green                   | Red                 | White                | Red               | Green                | Green  |
| 4. Was the intervention clearly described and delivered consistently across the study population?                                         | Green               | Green                    | Green                | Green               | Green               | Green            | Yellow           | Green             | Green                | Green                      | Green                   | Green                   | Green              | Green                   | Green               | Yellow               | Green             | Green                | Green  |
| 5. Were 80% of people randomized included in the final analysis?                                                                          | Red                 | Green                    | Gray                 | Red                 | Green               | Gray             | Gray             | Red               | Green                | Red                        | Gray                    | Red                     | Red                | Red                     | Red                 | White                | Green             | Green                | Green  |
| 6. Was information on people who withdrew given?                                                                                          | Green               | Green                    | Red                  | Green               | Green               | Red              | Green            | Red               | Red                  | Red                        | Red                     | Red                     | Red                | Red                     | Red                 | Red                  | White             | Red                  | Red    |
| 7. Was an ITT analysis included?                                                                                                          | Red                 | Green                    | Red                  | Red                 | Green               | Red              | Red              | Red               | Red                  | Green                      | Red                     | Red                     | Green              | White                   | Red                 | Green                | Green             | Green                | Red    |
| 8. Is there absence of evidence that more outcomes were measured than reported?                                                           | Green               | Green                    | Green                | Green               | Green               | Green            | Green            | Green             | Green                | Green                      | Green                   | Green                   | Green              | Green                   | Green               | Green                | Green             | Green                | Green  |
| 9. Were the outcome measures clearly defined, valid, reliable, and assessed consistently across all participants?                         | Green               | Yellow                   | Green                | Green               | Green               | Green            | Green            | Green             | Green                | Green                      | Green                   | Green                   | Green              | Green                   | Green               | Green                | Green             | Green                | Yellow |
| 10. Did they discuss power or include effect size?                                                                                        | Green               | Green                    | Green                | Green               | Green               | Green            | Green            | Green             | Green                | Green                      | Green                   | Red                     | Green              | Red                     | Red                 | Green                | Green             | Green                | Red    |
| 11. Do the authors control for confounders (either statistically, through matching or randomization)?                                     | Green               | Green                    | Yellow               | Yellow              | Green               | White            | Yellow           | Green             | Green                | Green                      | Green                   | Red                     | Green              | Green                   | Green               | Yellow               | Green             | Green                | Green  |
| 12. Did the statistical methods examine changes in outcome measures from before to after the intervention (change, not difference score)? | Green               | Green                    | Green                | Green               | Yellow              | Green            | Green            | Green             | Green                | Green                      | Green                   | Red                     | Green              | Green                   | Green               | Green                | Green             | Green                | Green  |
| 13. Were p-values for the pre to post change reported for all outcomes?                                                                   | Green               | Green                    | Green                | Green               | Green               | Green            | Green            | Green             | Green                | Green                      | Green                   | Red                     | Green              | Green                   | Green               | Red                  | Red               | Green                | Green  |
| 14. Were outcome measures of interest taken multiple times before the intervention and multiple times after (time-series design)?         | Red                 | Red                      | Red                  | Green               | Yellow              | Red              | Yellow           | Yellow            | Yellow               | Red                        | Yellow                  | Red                     | Yellow             | Yellow                  | Yellow              | Yellow               | Yellow            | Yellow               | Yellow |
| 15. Was the method used to assign participants to group truly random?                                                                     | Green               | Green                    | Gray                 | Gray                | Green               | Gray             | Gray             | Green             | Green                | Green                      | Yellow                  | Red                     | Green              | Green                   | Green               | Green                | Green             | Green                | Green  |
| 16. Was the number of participants randomized stated?                                                                                     | Green               | Green                    | Gray                 | Gray                | Green               | Gray             | Gray             | Green             | Green                | Green                      | Gray                    | Gray                    | Green              | Red                     | Red                 | Green                | Green             | Green                | Green  |
| 17. Were participants blinded to treatment allocation?                                                                                    | Red                 | Red                      | Red                  | Red                 | Red                 | Red              | Red              | Red               | Red                  | Red                        | Red                     | Red                     | Red                | Red                     | Red                 | Red                  | Red               | Red                  | Red    |
| 18. Were outcome assessors blinded to treatment allocation?                                                                               | Gray                | Red                      | Red                  | Red                 | Green               | Red              | Red              | Green             | Red                  | Green                      | Gray                    | Gray                    | White              | White                   | White               | White                | White             | Green                | Green  |
| 19. Was the success of the blinding procedure assessed?                                                                                   | Gray                | Gray                     | Gray                 | Gray                | Red                 | Gray             | Gray             | White             | Gray                 | Green                      | Gray                    | Gray                    | White              | White                   | White               | White                | White             | Red                  | White  |
| <b>TOTAL OF YES &amp; PARTIALLY (/19)</b>                                                                                                 | 12                  | 14                       | 8                    | 12                  | 16                  | 7                | 10               | 14                | 12                   | 15                         | 10                      | 3                       | 13                 | 10                      | 9                   | 11                   | 15                | 13                   |        |

LEGEND: green = yes, red = no, yellow = partially, gray = not applicable, white = not reported
