# Supplementary material for: The use of technology in the treatment of youth with eating disorders: A scoping review
Source: PubMed Central journal article supplement (PMC9700893; doi:10.1186/s40337-022-00697-5), 2022-11-24
Supplement: 40337_2022_697_MOESM2_ESM.pdf [file 40337_2022_697_MOESM2_ESM.pdf]

Supplementary Figure 2: Quality assessment of qualitative studies

|                                                                                         | Anastasiadou 2019 | Kasson 2021 | Naccache 2021 | Sanchez-Ortiz 2011 | Brothwood 2021 | Stewart 2021 | Shaw 2021 | Lindgreen 2018 |
|-----------------------------------------------------------------------------------------|-------------------|-------------|---------------|--------------------|----------------|--------------|-----------|----------------|
| 1. Was there a clear statement of the aims of the research?                             | Green             | Green       | Green         | Green              | Green          | Green        | Green     | Green          |
| 2. Is a qualitative methodology appropriate?                                            | Green             | Green       | Green         | Green              | Green          | Green        | Green     | Green          |
| 3. Was the research design appropriate to address the aims of the research?             | Green             | Green       | Green         | Green              | Green          | Green        | Green     | Green          |
| 4. Was the recruitment strategy appropriate to the aims of the research?                | Green             | Green       | Green         | Green              | Green          | Green        | Green     | Green          |
| 5. Was the data collected in a way that addressed the research issue?                   | Green             | Yellow      | Green         | Green              | Green          | Green        | Green     | Green          |
| 6. Has the relationship between researcher and participants been adequately considered? | Yellow            | Yellow      | Yellow        | Yellow             | Green          | Yellow       | Yellow    | Yellow         |
| 7. Have ethical issues been taken into consideration?                                   | Green             | Yellow      | Green         | Green              | Green          | Green        | Green     | Green          |
| 8. Was the data analysis sufficiently rigorous?                                         | Green             | Yellow      | Green         | Green              | Green          | Green        | Yellow    | Green          |
| 9. Is there a clear statement of findings?                                              | Green             | Green       | Green         | Green              | Green          | Green        | Green     | Green          |
| 10. How valuable is the research?                                                       | Green             | Green       | Green         | Green              | Green          | Green        | Green     | Green          |
| <b>TOTAL OF CRITERIA MET (/10)</b>                                                      | <b>9</b>          | <b>6</b>    | <b>9</b>      | <b>9</b>           | <b>10</b>      | <b>9</b>     | <b>8</b>  | <b>9</b>       |

LEGEND: green = yes, yellow = can't tell, red = no
